# Supplementary material for: Using Genomic Sequencing for Classical Genetics in E. coli K12
Source: PubMed Central journal article supplement (PMC3045373; doi:10.1371/journal.pone.0016717), 2011-02-25
Supplement: pone.0016717.s004.pdf [file pone.0016717.s004.pdf]

SUPPLEMENTARY TABLE 1. Table of large differences between MG1655 and NCM3722

| Position                           | MG1655     | NCM3722                                | Genes Affected                                                                                                                                                                                                                                    |
|------------------------------------|------------|----------------------------------------|---------------------------------------------------------------------------------------------------------------------------------------------------------------------------------------------------------------------------------------------------|
| 278387-279154<br>289858-290625     | IS1<br>IS1 | IS1<br>11 kb deletion<br>279155-290625 | Deletion of 11 genes of cryptic prophage CP4-6 by apparent recombination of IS1 elements                                                                                                                                                          |
| 573810-575013                      | IS5        | No insert                              | Outer membrane porin gene <i>nmpC</i> of DLP12 prophage interrupted by IS5 in MG1655 is intact in NCM3722                                                                                                                                         |
| 687070-688272                      | IS5        | No insert                              | IS5 upstream of <i>gltJKL</i> operon (glutamate/aspartate transport) in MG1655 is not present in NCM3722                                                                                                                                          |
| 806552-806565                      | No insert  | Lambda                                 | NCM3722 is a lambda lysogen. Lambda phage has wild type lambda sequence                                                                                                                                                                           |
| 916093-916101                      | No insert  | IS1                                    | IS1 interrupts <i>ybjD</i> gene. YbjD is a putative ATP-dependent endonuclease of OLD family                                                                                                                                                      |
| 1876598-1876594                    | No insert  | IS5                                    | IS5 interrupts <i>yeaP</i> gene. YeaP is a putative diguanylate cyclase                                                                                                                                                                           |
| 1976527-1977294<br>1977312-1977316 | IS1        | Tn1000                                 | Insert sites for IS1 and Tn1000 are separated by 9 base pairs. Both are upstream of the <i>flhDC</i> operon and disrupt the regulatory region in potentially different ways. FlhDC is the principal regulator of flagellar synthesis and swarming |
| 2099769-2100970                    | IS5        | No insert                              | Lipopolysaccharide biosynthesis gene <i>wbbL</i> interrupted by IS5 in MG1655 is intact in NCM3722                                                                                                                                                |

|                 |           |                                               |                                                                                                                                                                                                                                                                                                |
|-----------------|-----------|-----------------------------------------------|------------------------------------------------------------------------------------------------------------------------------------------------------------------------------------------------------------------------------------------------------------------------------------------------|
| 2108321-2126617 | No insert | IS1 and 18 kb deletion                        | Genes deleted are <i>rfaA</i> , <i>rfaD</i> , <i>rfaB</i> , <i>galF</i> , <i>wcaM</i> , <i>wcaL</i> , <i>wcaK</i> , <i>wzcC</i> , <i>wcaJ</i> , <i>cpsG</i> , <i>cpsB</i> , <i>wcaI</i> , <i>fli</i> , <i>gmd</i> , <i>wcaF</i> . All are related to lipopolysaccharide and capsule formation. |
| 2168198-2169452 | IS3       | No insert                                     | Repressor of galactitol utilization operon <i>gatR</i> interrupted in MG1655 is intact in NCM3722                                                                                                                                                                                              |
| 2481860-2481868 | No insert | IS1                                           | IS1 interrupts <i>evgA</i> gene. EvgA is a transcriptional activator that interacts with sensor histidine kinase EvgS to regulate acid and drug resistance                                                                                                                                     |
| 2773185-2773189 | No insert | IS2                                           | IS2 inserted between pseudogenes <i>yffW</i> and <i>yplI</i> , remnants of CP4-57 cryptic prophage                                                                                                                                                                                             |
| 3128165-3129367 | IS5       | 2 IS5 elements<br>7 kb sequence not in MG1655 | 7 kb sequence includes genes like those of <i>E.coli</i> strain BL21(DE3) at this location. The six genes code for a conserved protein, an acyl CoA synthetase, 2 permeases, an epimerase, and an oxomonoate synthase. Appears that sequence was deleted in MG1655                             |
| 3363724-3364740 | IS5       | No insert                                     | The <i>yceF</i> gene interrupted in MG1655 is intact in NCM3722. It lies in a cluster of genes of unknown function                                                                                                                                                                             |
| 3936750-3936758 | No insert | IS5                                           | IS5 inserted into <i>rbsR</i> , transcriptional repressor for ribose metabolism operon <i>rbsDACBKR</i> .                                                                                                                                                                                      |
| 4478833-4478826 | No insert | IS1                                           | IS1 inserted in <i>yjgN</i> , which encodes an inner membrane protein of unknown function                                                                                                                                                                                                      |
| 4496204-4497534 | IS2       | No insert                                     | IS2 element located between pseudogenes in KpLE2 phage                                                                                                                                                                                                                                         |

---

## **F plasmid**

In addition to the above large differences, NCM3722 carries an F plasmid of 67 kb. The F plasmid is identical to the 99159 bp plasmid annotated in Genbank (AP00198) except in two regions. The *finO* gene is intact in the NCM3722 F plasmid because the IS3 element at 1-1258 is not present. (Disruption of *finO*, which codes for the transacting fertility inhibition factor, results in constitutive *tra* expression.) The 37 kb region between 4191-41089 is absent from the F plasmid in NCM3722 and is replaced with a 6.4 kb region. The 37 kb region that is missing consists of 22 genes including the *repB* gene, which codes for the RepFIB replication protein of plasmid P307. The 6.4 kb region that replaces it carries an intact *repA* gene, which codes for the RepFIC protein. (This gene is disrupted by Tn1000 in the missing 37 kb region.) It also contains 2.7 kb that codes for a PHP N-terminal protein, a putative phosphoesterase, and 1.3 kb without similarity to any sequence in the database.
