# Supplementary material for: Using Genomic Sequencing for Classical Genetics in E. coli K12
Source: PubMed Central journal article supplement (PMC3045373; doi:10.1371/journal.pone.0016717), 2011-02-25
Supplement: pone.0016717.s005.pdf [file pone.0016717.s005.pdf]

SUPPLEMENTARY TABLE 2. Raw polymorphisms other than contig breaks<sup>a</sup>

|                                         | NCM<br>4139 | NCM<br>4287 | NCM<br>4299 | NCM<br>4300 | NCM<br>4370 | NCM<br>4384 | NCM<br>4401 | NCM<br>4781 | Eight<br>strains | Seven<br>strains <sup>b</sup> |
|-----------------------------------------|-------------|-------------|-------------|-------------|-------------|-------------|-------------|-------------|------------------|-------------------------------|
| SNPs                                    | 29          | 8           | 9           | 14          | 14          | 15          | 33          | 157         | 279              | 131                           |
| Synonymous                              | 15          | 1           | 4           | 5           | 0           | 1           | 3           | 76          | 105              | 32                            |
| Non-Synonymous                          | 13          | 4           | 3           | 6           | 2           | 3           | 7           | 35          | 73               | 37                            |
| Non-Coding SNPs                         | 1           | 3           | 2           | 3           | 12          | 11          | 23          | 46          | 101              | 62                            |
| Small Insertions/Deletions <sup>c</sup> | 23          | 34          | 30          | 68          | 26          | 87          | 123         | 487         | 876              | 401                           |
| Frameshift <sup>d</sup>                 | 13          | 20          | 15          | 40          | 17          | 50          | 76          | 358         | 589              | 239                           |
| Intergenic                              | 10          | 14          | 15          | 28          | 9           | 35          | 47          | 129         | 377              | 164                           |
| Large Insertions/Deletions              | 1           | 1           | 1           | 1           | 2           | 0           | 1           | 2           | 9                | 12                            |
| Total                                   | 53          | 43          | 40          | 83          | 42          | 100         | 157         | 646         | 1164             | 544                           |

<sup>a</sup> Predicted using Mauve and PolyMFind; see Fig. 1

<sup>b</sup> Strain NCM 4781, which has only 10-fold coverage, was omitted. The numbers in this column are derived from a separate seven strain table, not from this eight strain table.

<sup>c</sup> Most of these are putative homopolymer errors: 21 for NCM4139; 31 for NCM4287; 30 for NCM4299; 67 for NCM4300; 26 for NCM4370; 86 for NCM4384; 122 for NCM4401; 426 for NCM4781.

<sup>d</sup> Within predicted coding sequence.
