# Supplementary material for: Using Genomic Sequencing for Classical Genetics in E. coli K12
Source: PubMed Central journal article supplement (PMC3045373; doi:10.1371/journal.pone.0016717), 2011-02-25
Supplement: pone.0016717.s006.pdf [file pone.0016717.s006.pdf]

SUPPLEMENTARY TABLE 3. Homopolymer error as a function of homopolymer length

| Homopolymer length | Number of homopolymers <sup>a</sup> | Homopolymer errors <sup>b</sup> | Missing nucleotide | Extra nucleotide | Percent error <sup>c</sup> |
|--------------------|-------------------------------------|---------------------------------|--------------------|------------------|----------------------------|
| 1                  | 17120976                            | 6                               | 0                  | 6                | .000035                    |
| 2                  | 4622230                             | 2                               | 1                  | 1                | .000043                    |
| 3                  | 1113493                             | 6                               | 2                  | 4                | .00054                     |
| 4                  | 292083                              | 24                              | 2                  | 22               | .0082                      |
| 5                  | 94688                               | 45                              | 13                 | 32               | .047                       |
| 6                  | 28216                               | 110 <sup>d</sup>                | 48                 | 62               | .39                        |
| 7                  | 7000                                | 103 <sup>d</sup>                | 67                 | 36               | 1.5                        |
| 8                  | 1458                                | 68                              | 61                 | 7                | 4.7                        |
| 9                  | 129                                 | 19                              | 17                 | 2                | 15                         |

<sup>a</sup> For seven strains.

<sup>b</sup> Calculated as described in Materials and Methods for the seven strains with the highest sequence coverage.

<sup>c</sup> Calculated by dividing the number of putative errors by the total number of homopolymers of each length.

<sup>d</sup> Between homopolymers of length 6 and 7, the chance that a nucleotide will be erroneously missed becomes higher than the chance that one will be erroneously added.
